# Supplementary material
Source: PubMed Central journal article supplement (PMC2084290)

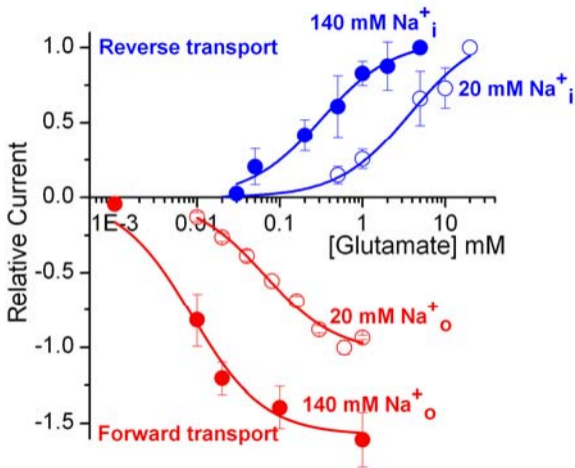

Supplement: pnas_0704570104_1.pdf [file pnas_0704570104_1.pdf]

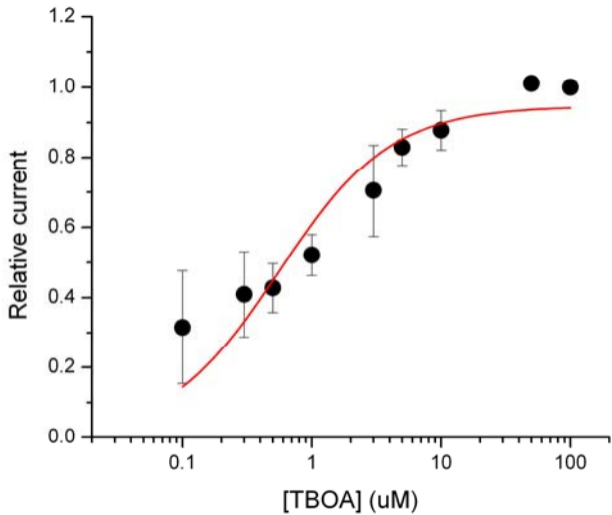

Supplement: pnas_0704570104_2.pdf [file pnas_0704570104_2.pdf]

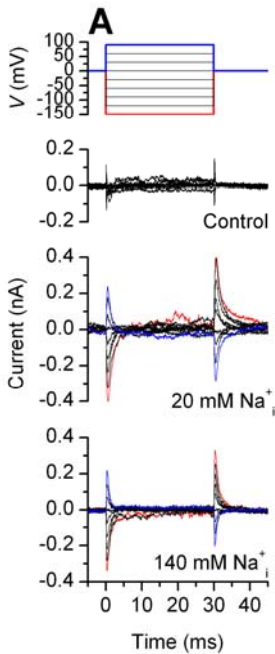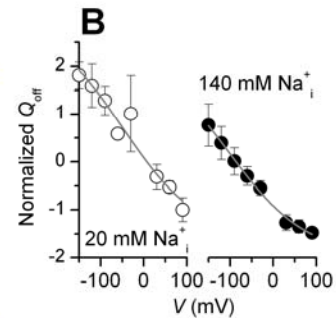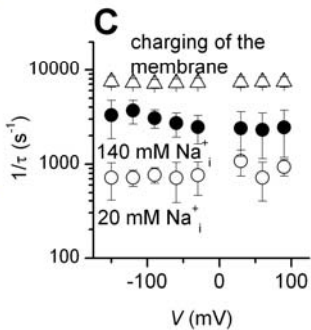

Supplement: pnas_0704570104_3.pdf [file pnas_0704570104_3.pdf]

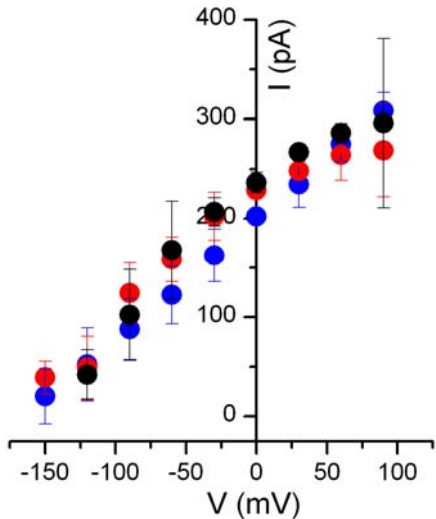

Supplement: pnas_0704570104_4.pdf [file pnas_0704570104_4.pdf]

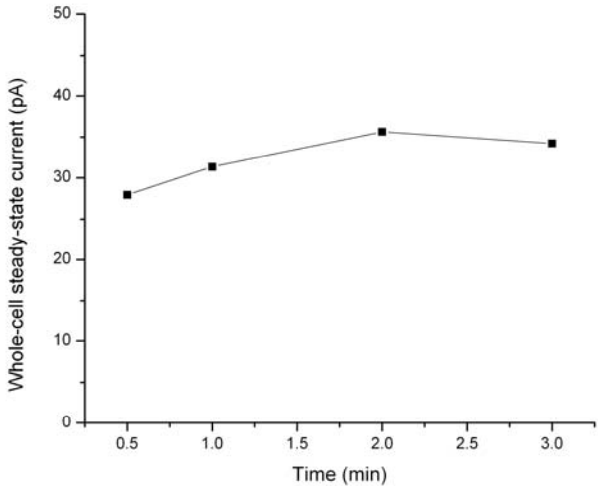

Supplement: pnas_0704570104_5.pdf [file pnas_0704570104_5.pdf]

Patch current (pA)

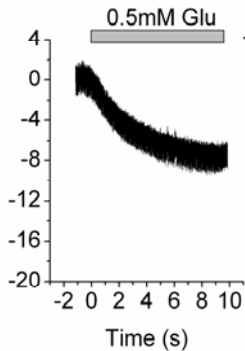

wash

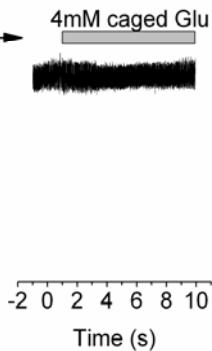

wash

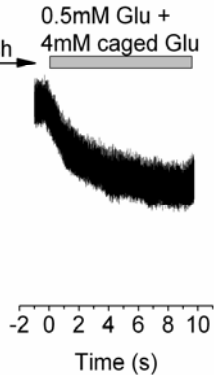

-patch current (pA)

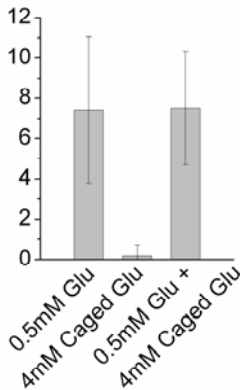

Supplement: pnas_0704570104_6.pdf [file pnas_0704570104_6.pdf]

Whole-cell current (pA)

600

400

200

0

mV

+90

+60

+30

0

-30

-60

$h\nu$

-10

0

10

20

30

40

50

60

Time (ms)

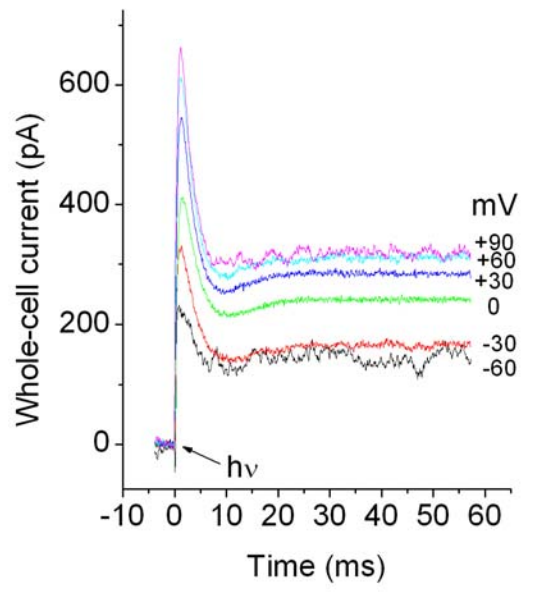

Supplement: pnas_0704570104_7.pdf [file pnas_0704570104_7.pdf]

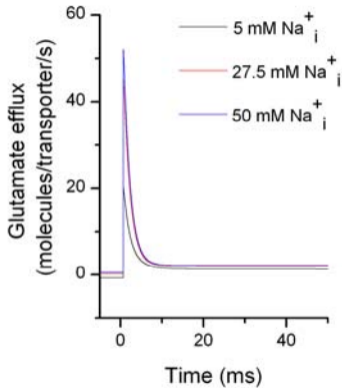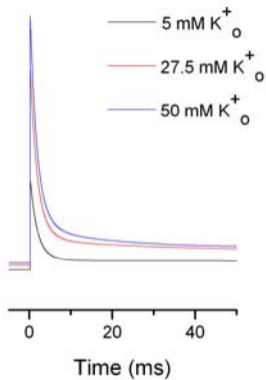

Supplement: pnas_0704570104_8.pdf [file pnas_0704570104_8.pdf]
